# Supplementary material
Source: PubMed Central journal article supplement (PMC3655471)
Supplement: emboj201386s1.pdf [file emboj201386s1.pdf]

## Supplementary figure legends

### **Figure S1. Dose-dependent antiviral activity of CMA**

A, Antiviral activity of CMA in macrophages was studied using a FFLuc encoding VSV replicon. B, Macrophages were stimulated with decreasing concentrations of CMA (500 $\mu$ g/ml – 31,25 $\mu$ g/ml in two-fold dilutions) and subsequently infected with the VSV replicon particles. 18h after stimulation luciferase activity was assessed (left panel) and cell viability was determined (right panel). C, pIFN $\beta$ -firefly-luciferase macrophages were treated with decreasing concentrations of CMA (500 $\mu$ g/ml – 31,25 $\mu$ g/ml in two-fold dilutions). After 18h luciferase activity was assessed (left panel) and cell viability was determined (right panel). Representative results out of 3 independent experiments are depicted.

### **Figure S2. CMA-triggered type I IFN response is TLR- and MAVS-independent and mediated via TBK1/IKK $\epsilon$**

A, Wild type and TBK1/IKK $\epsilon$  double-deficient MEFs were transfected with poly(I:C), pppRNA, plasmid DNA or stimulated with CMA (500 $\mu$ g/ml) for 2h. Cells were collected and assessed for phospho-IRF3. Bone marrow-derived wild type (B), MyD88<sup>-/-</sup> (C) and Trif<sup>-/-</sup> (D) macrophages (M $\Phi$ ) were stimulated as described above. After 18h supernatants were collected and IP-10 production was determined by ELISA. In addition phospho-IRF3 was analyzed 2h after stimulation. (E) Bone marrow-derived wild type or (F) MAVS<sup>-/-</sup> macrophages were stimulated with pppRNA or CMA. ELISA and western blot were performed as described for A-D. Representative results out of 2 independent experiments are depicted.

### **Figure S3. Antiviral activity of CMA is STING-dependent**

A, Supernatants of pretreated macrophages were assessed for antiviral properties using the VSV-FFLuc replicon in supernatant transfer experiments. B, bone marrow-derived wild type or STING-deficient macrophages were left untreated, transfected with pppRNA or stimulated with CMA (500 $\mu$ g/ml). After 18h the supernatants were harvested and diluted 1:20. The diluted supernatants (grey bars) were then transferred onto macrophages that were subsequently infected with VSV replicon particles. As a control infected macrophages were left untreated or stimulated with the equivalent concentration of CMA (25 $\mu$ g/ml; 1:20 dilution of 500  $\mu$ g/ml) in the diluted supernatants (hatched bars). Representative results out of 2 independent experiments are depicted.

### **Figure S4. HEK293T stably expressing murine STING respond to CMA**

A-B, HEK293T cells stably expressing murine STING were transiently transfected with a total amount of 200ng DNA per 96-well, whereas 12.5ng of pIFN $\beta$ -GLuc (A) or pELAM-GLuc (B)

reporter plasmid were included. An empty pCI vector served as a stuffer. After 24h cells were transfected with poly(I:C), pppRNA, ISD and c-diGMP or stimulated with LPS or decreasing concentrations of CMA (from 500 $\mu$ g/ml to 15,62 $\mu$ g/ml). Luciferase activity was measured after an additional period of 24h in the supernatant (upper panel). Cell viability was determined by CellTiter-Blue assay (lower panel). Representative results out of 3 independent experiments are depicted.

#### **Figure S5. R231A dissociates c-diGMP- from CMA-mediated STING activation**

A-C, 293T cells were transiently transfected with the indicated STING constructs (25, 12.5, 6.25 and 0ng), whereas 12.5ng of pIFN $\beta$ -GLuc reporter plasmid were included. For titrations, an empty pCI vector served as a stuffer to obtain 200ng total plasmid DNA. After 24h cells were stimulated with c-diGMP or CMA (500 $\mu$ g/ml and 125 $\mu$ g/ml). Luciferase activity was measured after an additional period of 24h in the supernatant and data were normalized to the condition without STING overexpression. Plasmids coding for full-length murine STING (A), murine STING-I199N (B) and murine STING-R231A (C) were tested. D, Expression of the above-described constructs was studied in 293T cells 24h after transfection (200ng per 96-well) using western blot, whereas  $\beta$ -Actin served as a loading control. Representative results out of 3 independent experiments are depicted.

#### **Figure S6. The CTT is not required for CMA binding**

The interaction of mSTING-LBD- $\Delta$ CTT with c-diGMP, c-diAMP and CMA detected by thermal shift assay. Purified mSTING LBD lacking the CTT (138-341) (i) was analyzed with different concentrations of c-diGMP/c-diAMP/CMA. (ii) Thermal shifts of (iii) fluorescence intensity vs. temperature are shown. Representative results out of 2 experiments are depicted.

#### **Figure S7. Comparison of mouse STING:CMA and human STING:c-diGMP**

Superposition of mouse STING, bound to two CMA molecules (brown ribbon model and with magenta CMA stick models), with human STING, bound to c-diGMP (PDB accession code 4F5D, cyan ribbon model with green c-diGMP stick model). The superposition shows a similar dimer structure, shared ligand binding site and overall similar folding of the lid region, suggesting that CMA activates murine STING by a similar structural mechanism than c-diGMP.

#### **Table S1. Data Collection and Refinement Statistics**

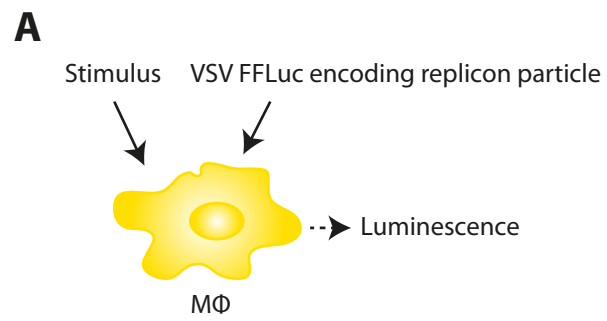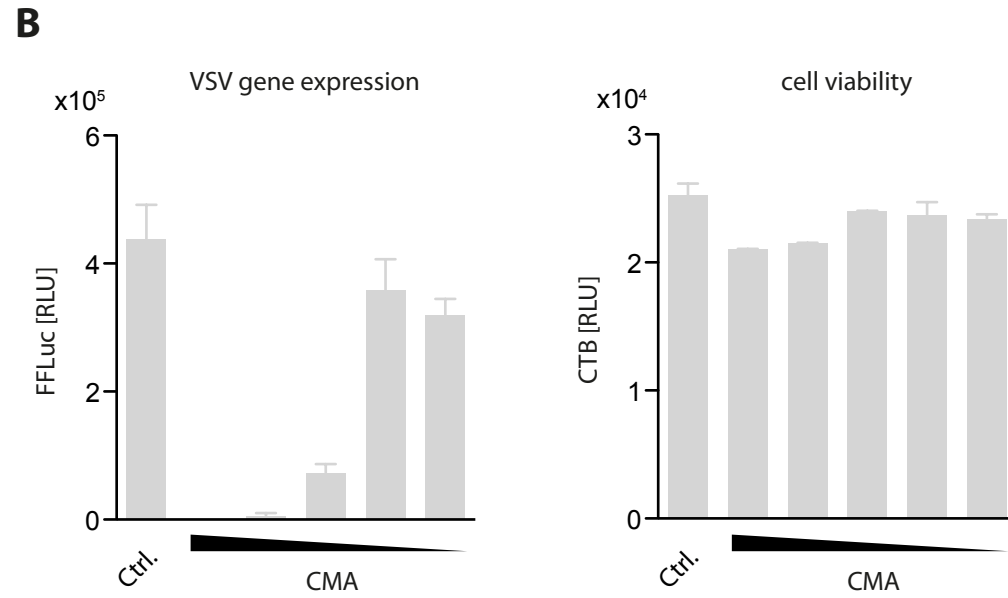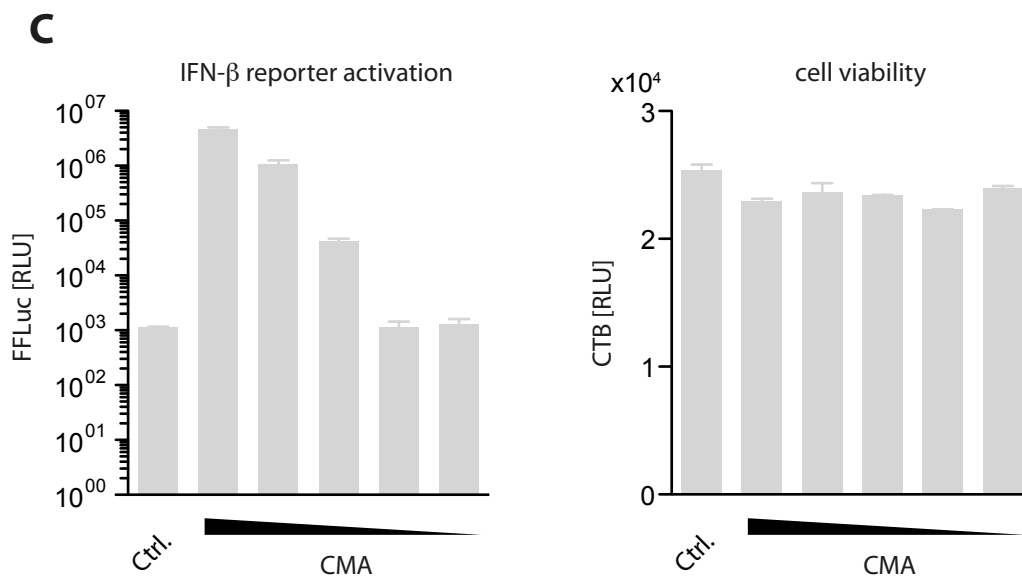

**Figure S1**

**A**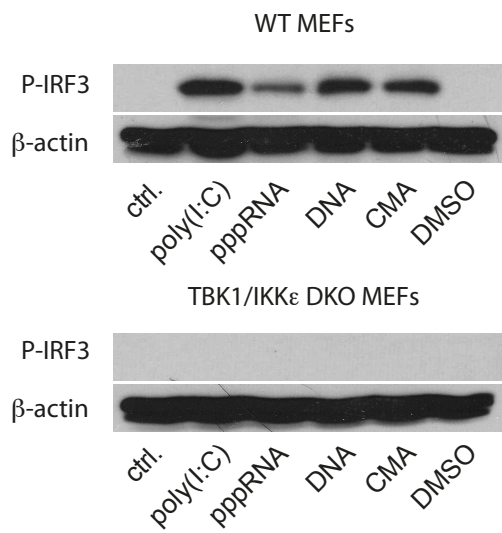**B**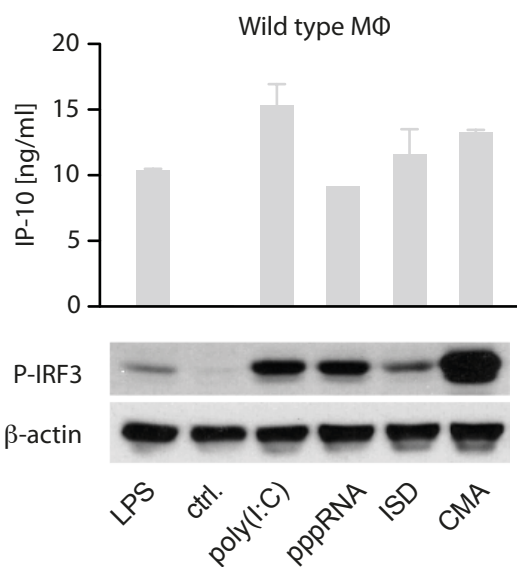**C**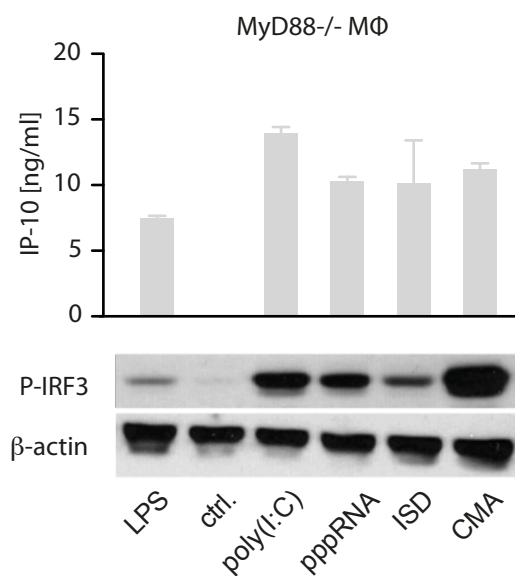**D**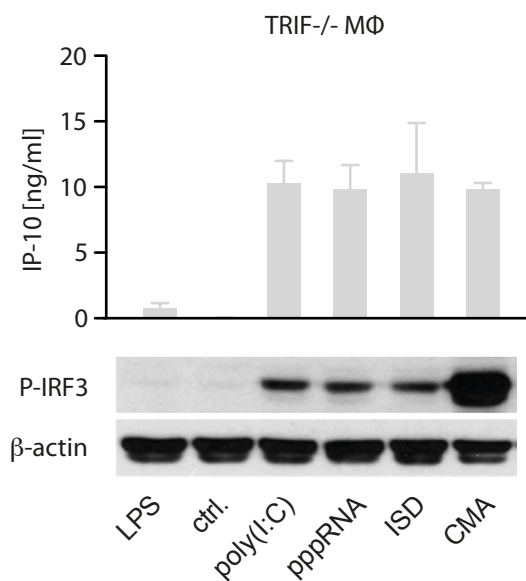**E**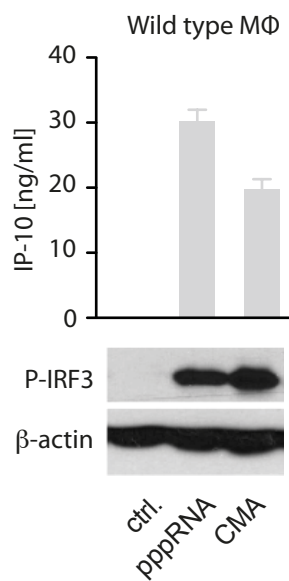**F**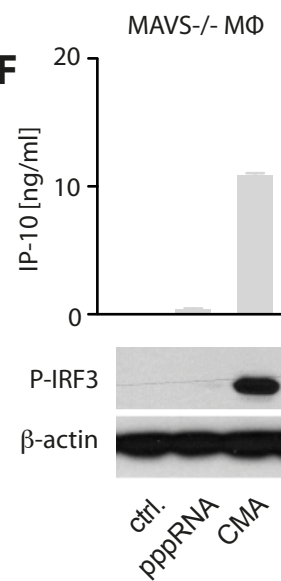**Figure S2**

**A**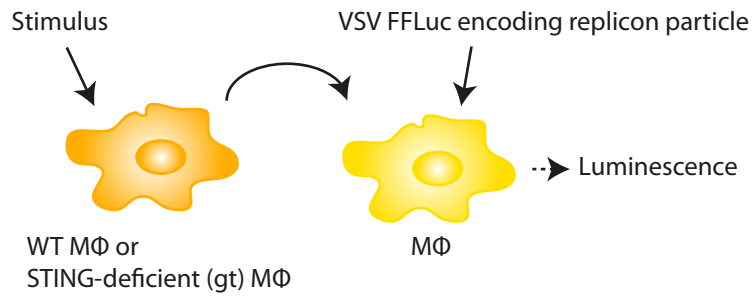**B**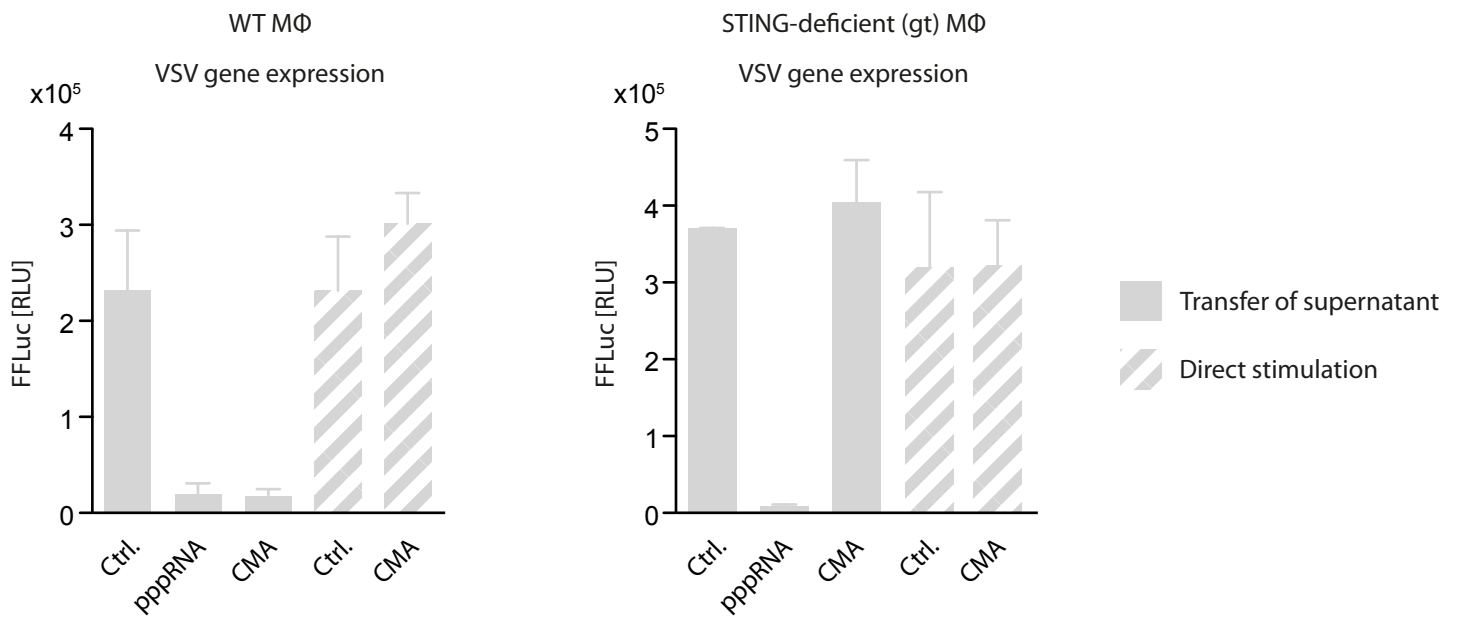**Figure S3**

**A**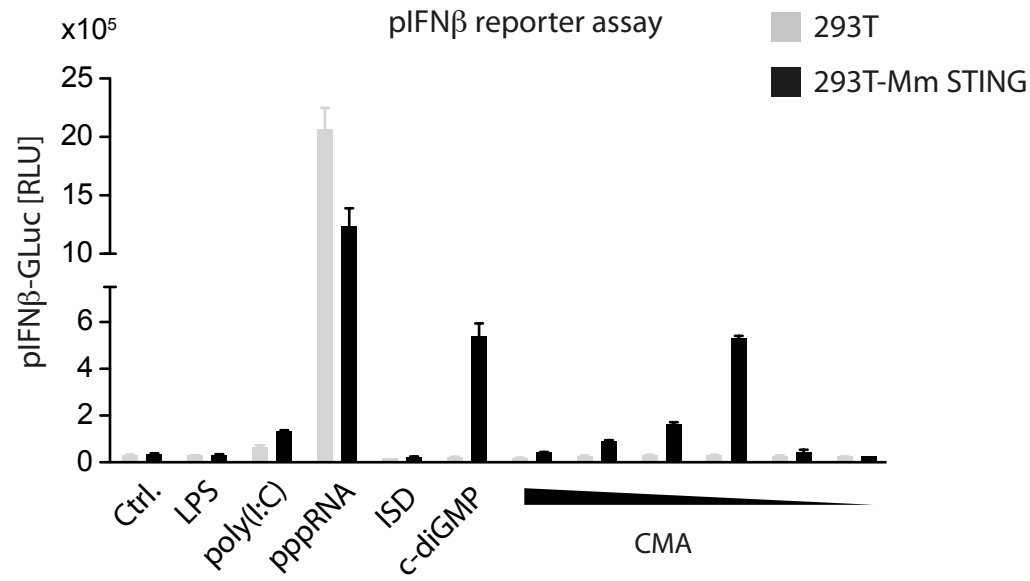**B**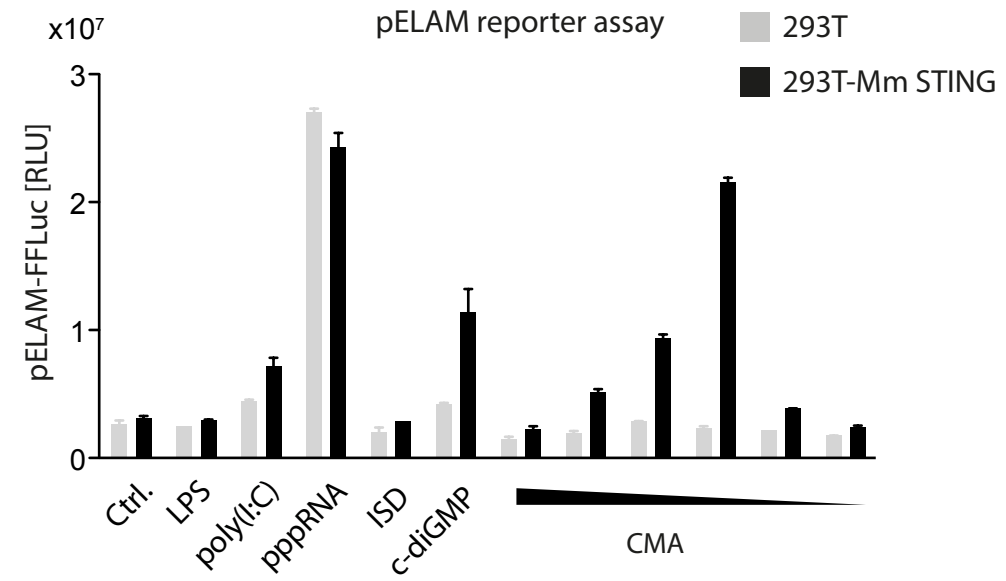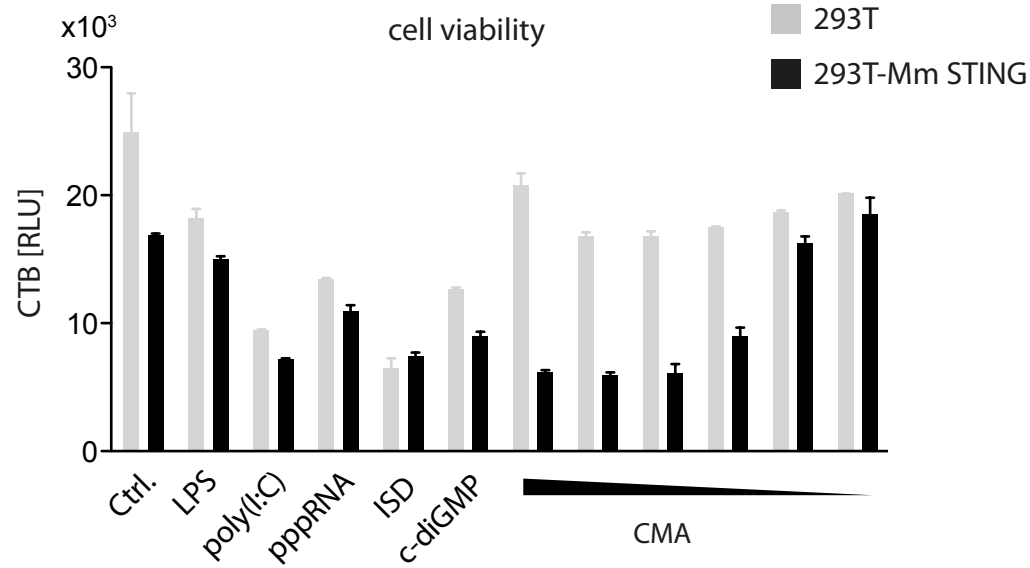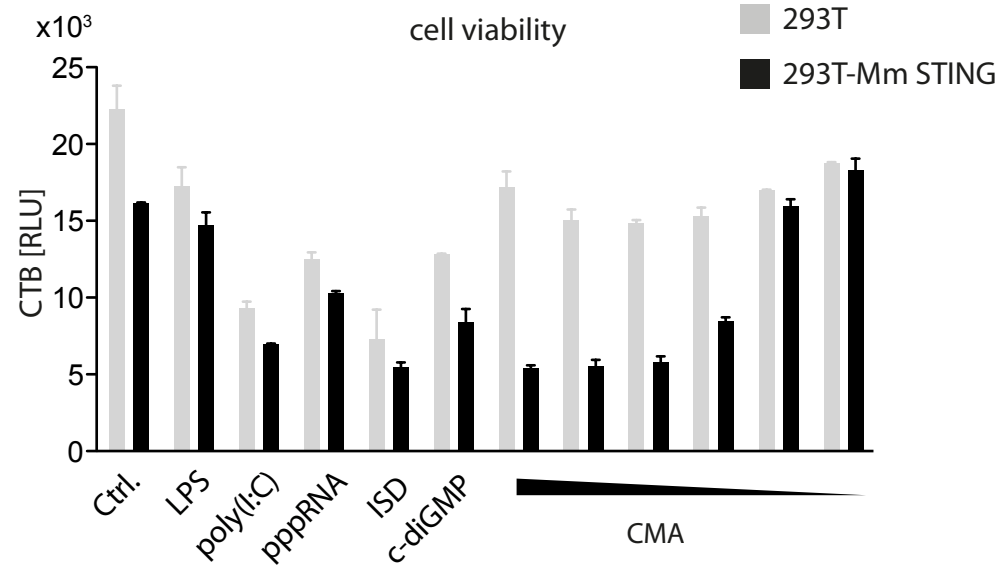**Figure S4**

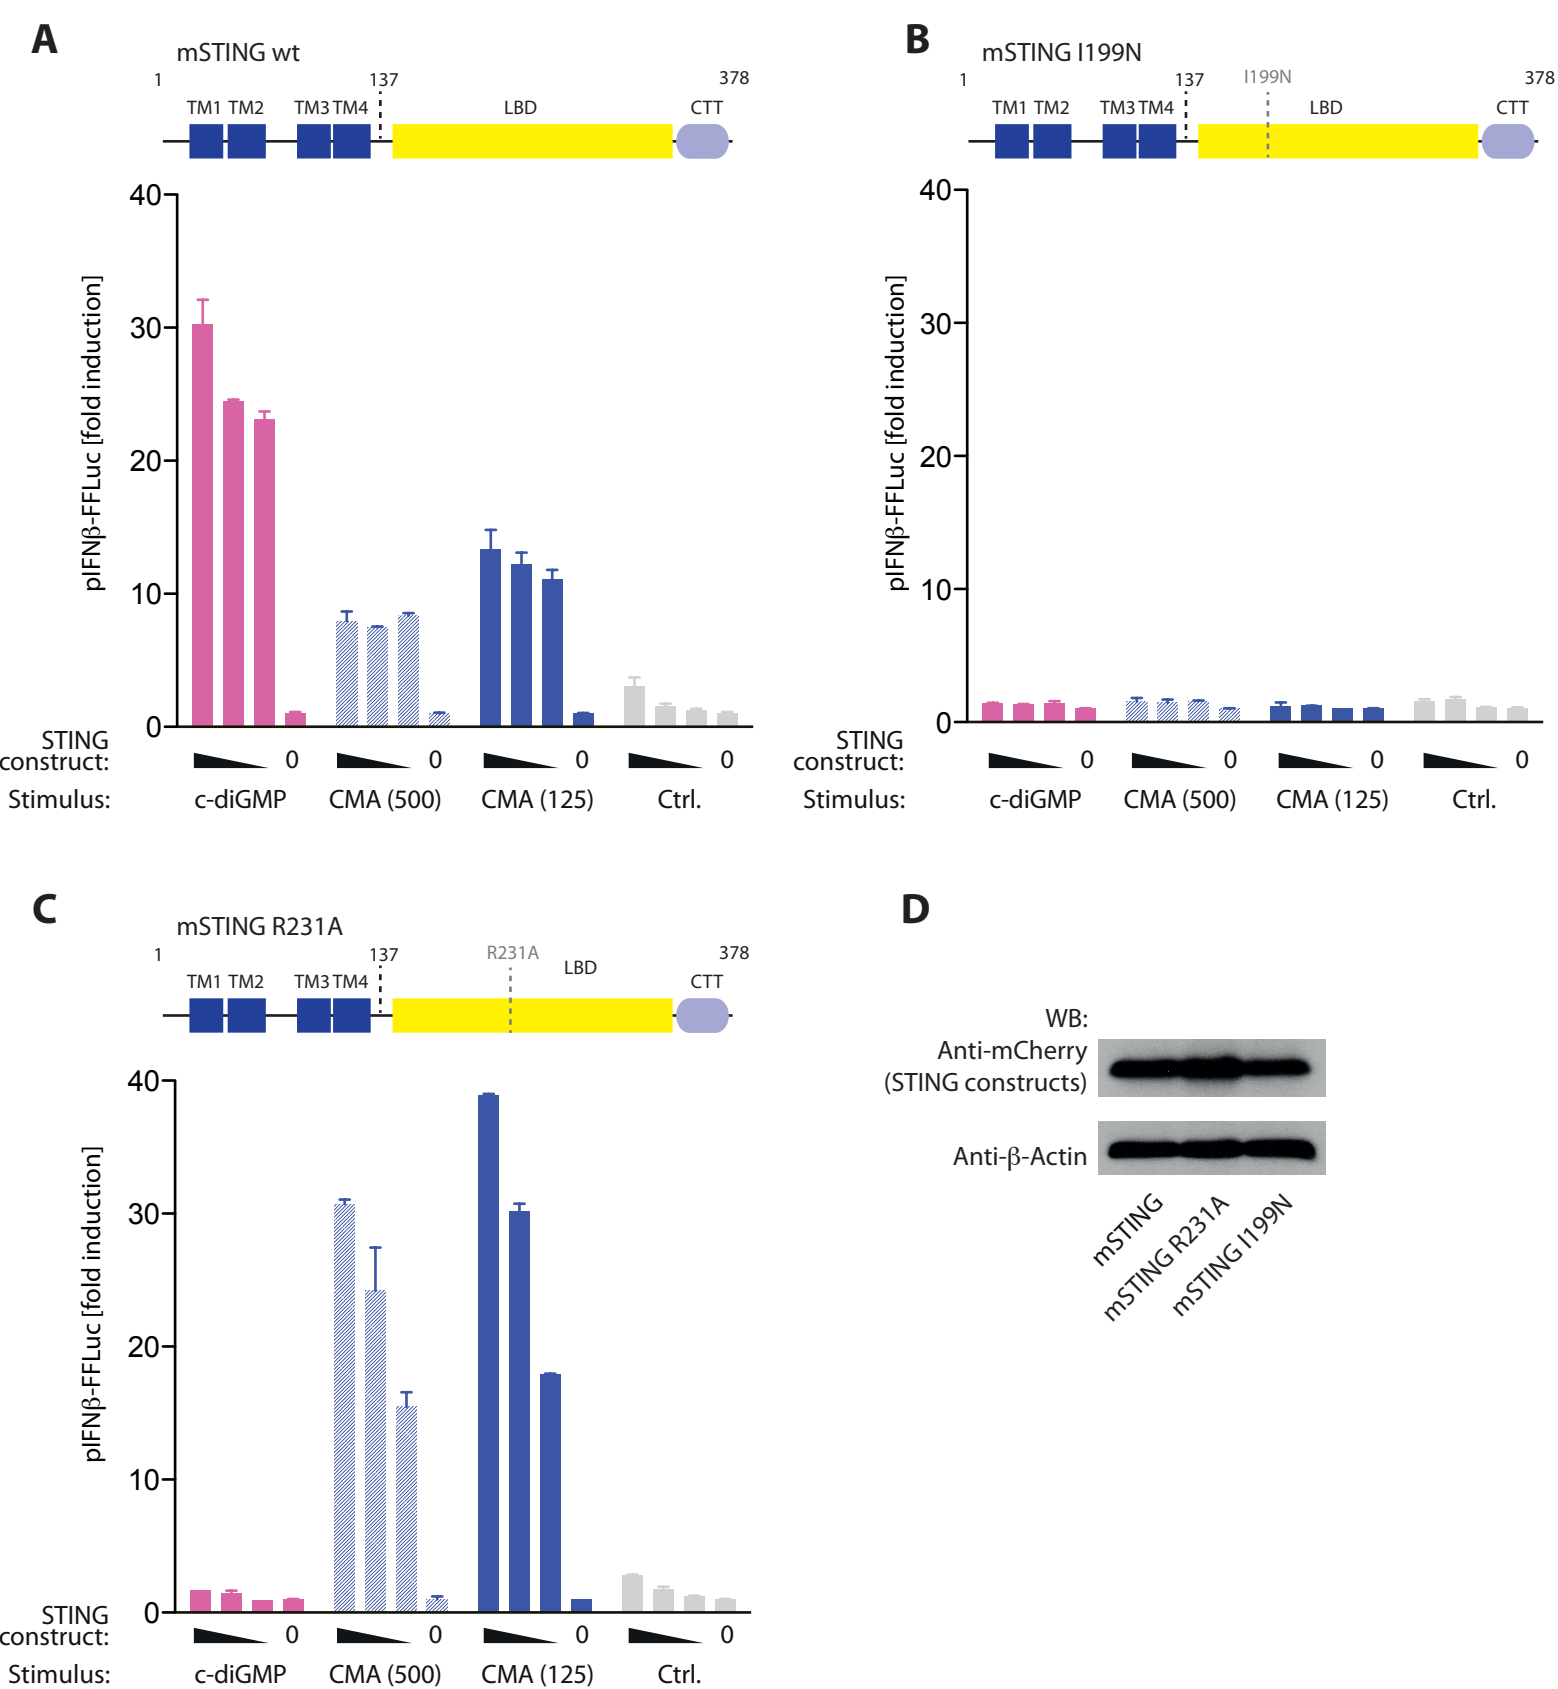

**Figure S5**

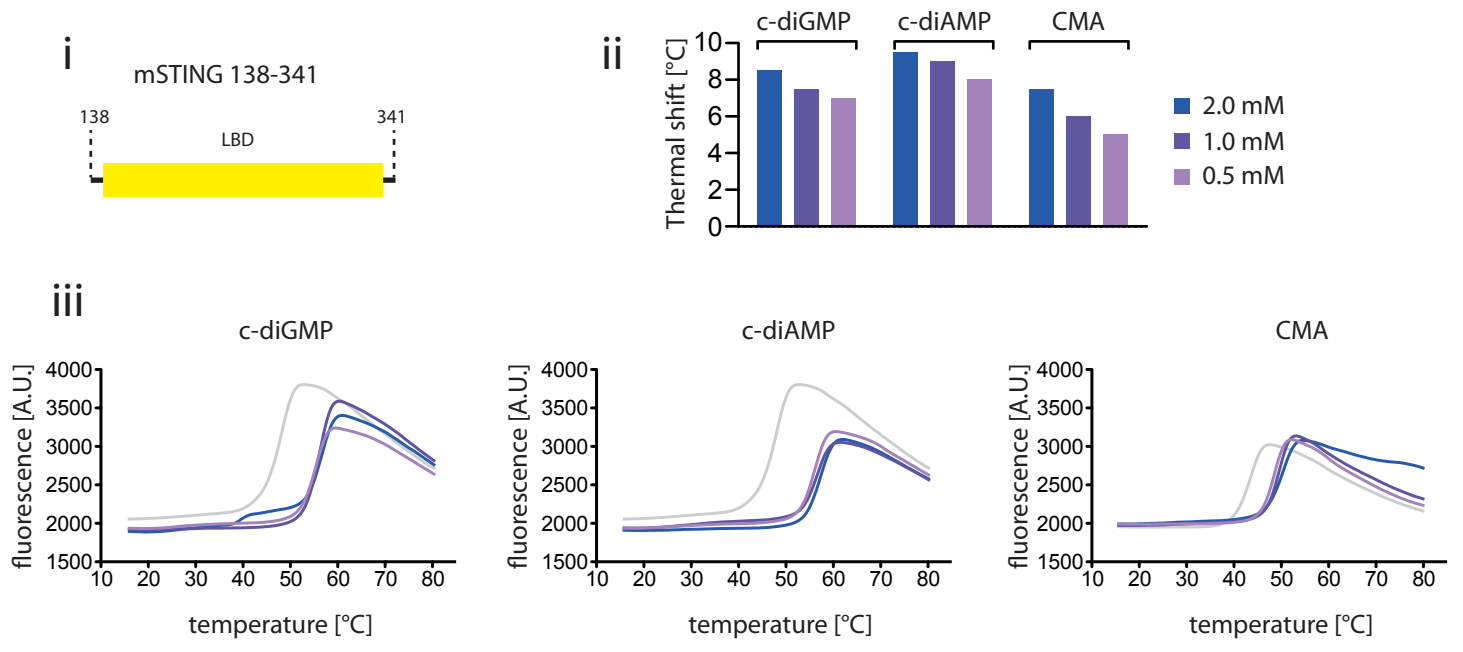

Figure S6



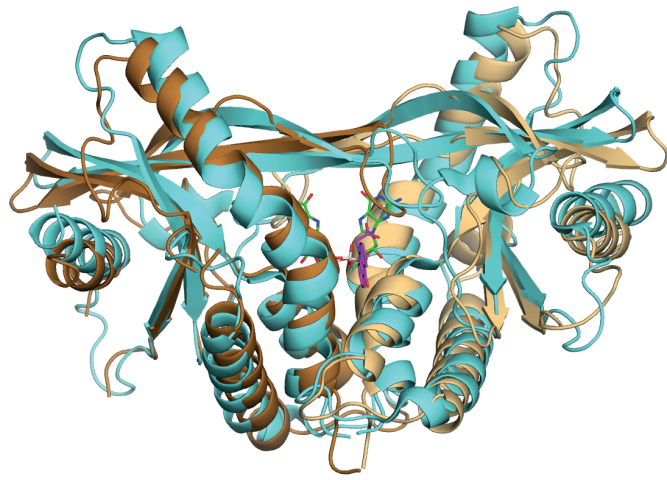

**Figure S7**

---

**Data collection**

|                                    |                             |
|------------------------------------|-----------------------------|
| Space group                        | R3                          |
| Cell dimensions                    |                             |
| <i>a</i> , <i>b</i> , <i>c</i> (Å) | 108,54 108.54, 101.83       |
| <i>a</i> , <i>b</i> , <i>g</i> (°) | 90.0, 90.0, 120.0           |
| Resolution (Å)                     | 50.0 – 2.75 (2.91 – 2.75) * |
| <i>R</i> <sub>meas</sub> (%)       | 5.1 (77.2)                  |
| <i>I</i> / <i>σ</i> <i>I</i>       | 19.17 (1.97)                |
| Completeness (%)                   | 99.3 (98.3)                 |
| Redundancy                         | 4.0 (3.9)                   |

**Refinement**

|                                                         |              |
|---------------------------------------------------------|--------------|
| Resolution (Å)                                          | 34.38 – 2.75 |
| No. reflections                                         | 11444        |
| <i>R</i> <sub>work</sub> / <i>R</i> <sub>free</sub> (%) | 21.0 / 23.7  |
| No. atoms                                               |              |
| Protein                                                 | 2989         |
| Ligand/ion                                              | 38           |
| Water                                                   | 32           |
| <i>B</i> -factors                                       |              |
| Protein                                                 | 73,5         |
| Ligand/ion                                              | 39,2         |
| Water                                                   | 62,5         |
| R.m.s deviations                                        |              |
| Bond lengths (Å)                                        | 0,007        |
| Bond angles (°)                                         | 1,159        |
| Ramachandran values                                     |              |
| Favored                                                 | 343          |
| Allowed                                                 | 19           |
| Outliers                                                | 0            |
| PDB Accession code                                      | 4JC5         |

---

\* Values in parentheses are for highest resolution shell

**Table S1. Data Collection and Refinement Statistics**
